# Supplementary material for: Two-dimensional nanosheets of bimetallic chalcogenide-tagged nitrogen-doped carbon as a cathode for high-performance and durable zinc-ion capacitors
Source: Royal Society of Chemistry journal article supplement (doi:10.1039/d2ta07524e), 2022-12-23
Supplement: d2ta07524e1.pdf [file d2ta07524e1.pdf]

**Two-dimensional Nanosheets of Bimetallic Chalcogenide-Tagged Nitrogen-Doped Carbon as a Cathode for High-Performance and Durable Zinc-Ion Capacitor**

*Swati J. Patil\**, *Nilesh R. Chodankar*, *Seung-Kyu Hwang*, *Pragati A Shinde*, *Ganji Seeta Rama Raju*, *Kugalur Shanmugam Ranjith*, *Smita V. Karekar*, *Yun-Suk Huh\**, *Young-Kyu Han\**

**Dr. Swati J. Patil** ([swatipatil39@gmail.com](mailto:swatipatil39@gmail.com))

Department of Energy and Material Engineering, Dongguk University-Seoul, Seoul 04620, Republic of Korea

Department of Biochemistry and Biophysics, Texas A&M University, College Station, TX 77843, USA

**Dr. Nilesh R. Chodankar, Dr. Ganji Seeta Rama Raju, Dr. Kugalur Shanmugam Ranjith, and Prof. Young-Kyu Han** ([ykenegy@dongguk.edu](mailto:ykenegy@dongguk.edu))

Department of Energy and Material Engineering, Dongguk University-Seoul, Seoul 04620, Republic of Korea

**Mr. Seung-Kyu Hwang, Smitha V. Karekar and Prof. Yun Suk Huh** ([yunsuk.huh@inha.ac.kr](mailto:yunsuk.huh@inha.ac.kr))

Department of Biological Engineering, NanoBio High-Tech Materials Research Center, Inha University, Incheon 22212, Republic of Korea

Department of Biological Sciences and Bioengineering, Inha University, Incheon 22212, Republic of Korea

**Dr. Pragati A Shinde**

Department of Sustainable and Renewable Energy Engineering, University of Sharjah, Sharjah 27272, United Arab Emirates

## Experimental details

### Synthesis of NbMo<sub>6</sub>S<sub>8</sub>/NC

Ammonium molybdate tetrahydrate ((NH<sub>4</sub>)<sub>6</sub>Mo<sub>7</sub>O<sub>24</sub>·4H<sub>2</sub>O), and thiourea (NH<sub>2</sub>CSNH<sub>2</sub>) were purchased from Sigma-Aldrich and used as received without any further purifications. Initially, 1 g of CS, (C<sub>6</sub>H<sub>11</sub>NO<sub>4</sub>)<sub>n</sub> were dissolved in 50 mL of 1% HCl aqueous solution (A) under constant stirring for 2 h. Next, 1 mmol of NbCl<sub>5</sub> dissolved in previous solution and stirred it next 2 h to obtain the milky solution, noted as A. Meanwhile, solution B was prepared in 50 mL distilled water with adding 2mmol of (NH<sub>4</sub>)<sub>6</sub>Mo<sub>7</sub>O<sub>24</sub>·4H<sub>2</sub>O. Finally, solution B added dropwise to the above CS-containing solution A and stirred for 2 h. Then, a desired amount of thiourea was added to the above milky white suspension and dissolved by stirring vigorously for 1 h. Then the final solution was transferred into a stainless-steel autoclave and heated at 180 °C for 12 h and then after completing reaction it keeps for natural cooling. The resulting blackish colored suspension was then centrifuged for 10 min under 7000 rpm. The obtained suspension was filtered and dried at 60° C under vacuum for 6h to acquire nanosheets. Finally, the obtained product annealed at 700°C under N<sub>2</sub> atmosphere for 2h to obtain the of NbMo<sub>6</sub>S<sub>8</sub>/NC phase. Nitrogen and carbon undoped NbMo<sub>6</sub>S<sub>8</sub> material were obtained using the same hydrothermal process with use of CS.

### Material characterizations

Powder X-ray diffraction (XRD) patterns of the prepared samples were recorded on a PANalytical X'Pert Pro Multi-Purpose X-ray diffractometer by using the Cu K $\alpha$  radiation source ( $\lambda = 0.15406$  nm) with a scan step size  $2\theta$  is  $0.001^\circ$ . The morphologies of the prepared samples were seen using a scanning electron microscope (SEM) SU800 and Field emission-transmission electron microscope (FE-TEM, JEM-2100F, JEOL, Japan) equipped with an energy dispersive X-ray detector (EDS) at an acceleration voltage of 100 kV. X-ray photoelectron spectroscopy (XPS) measurement were performed with a Thermo Scientific with an Al K-alpha X-ray source. The Raman spectra (FEX, NOST, Republic of Korea) were employed for the prepared samples with a 532 nm excitation laser. The Brunauer-Emmett-Teller surface area were calculated by the BET method.

## Electrochemical Measurements

The water in salt  $\text{NbMo}_8\text{S}_6/\text{NC}$  ZIC was fabricated with a zinc foil acting as counter electrode and reference electrodes. The aqueous electrolyte consisted of 0.2 M  $\text{ZnClO}_4$  and 17 M  $\text{NaClO}_4$  additive salt. The cyclic voltammetry (CV) testing and galvanostatic charge/discharge (GCD) measurements were conducted with a Wonatech measurement system (WonATech, South Korea), conducted in the potential range of 0–1.5 V (vs  $\text{Zn}^{2+}/\text{Zn}$ ). Electrochemical impedance spectra (EIS) experiments were carried out with 10 mV amplitude in the frequency from 1 MHz to 10 mHz. All electrochemical parameter values are calculated without taking the Zn-electrode mass into consideration.

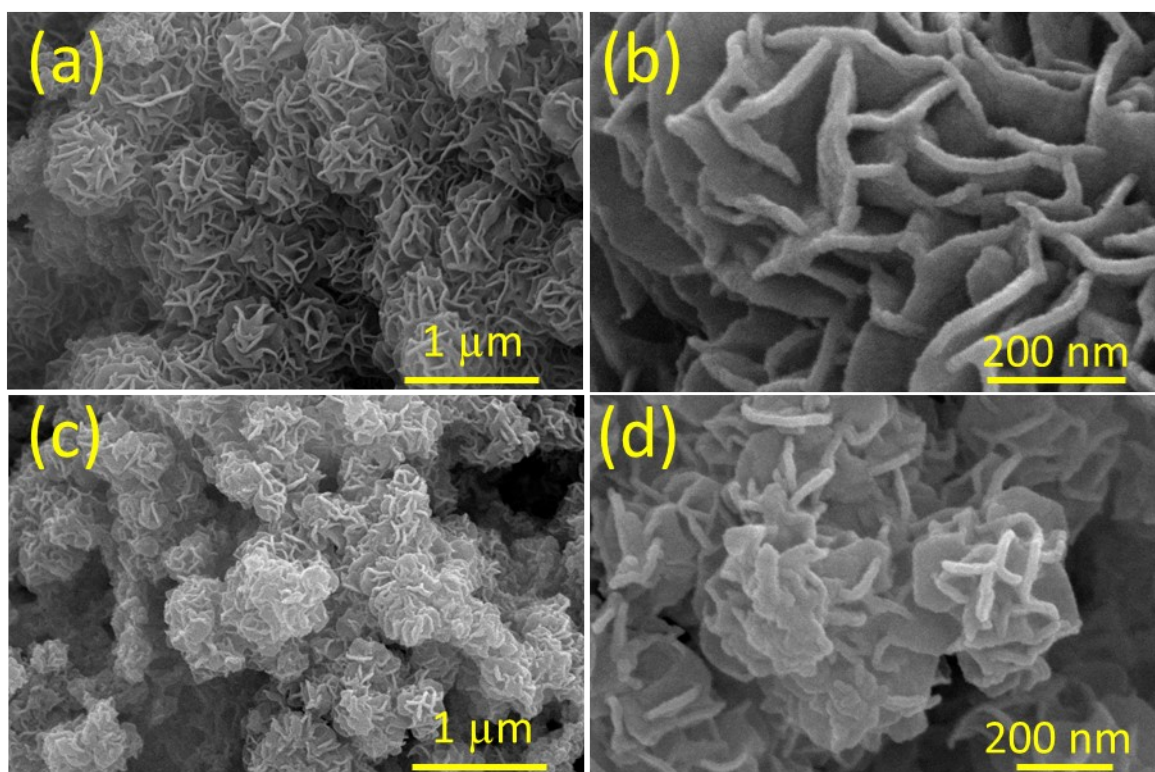

Figure S1 The surface morphologies of (a, b)  $\text{NbMo}_6\text{S}_8$  and (c, d)  $\text{NbMo}_6\text{S}_8/\text{NC}$  materials.

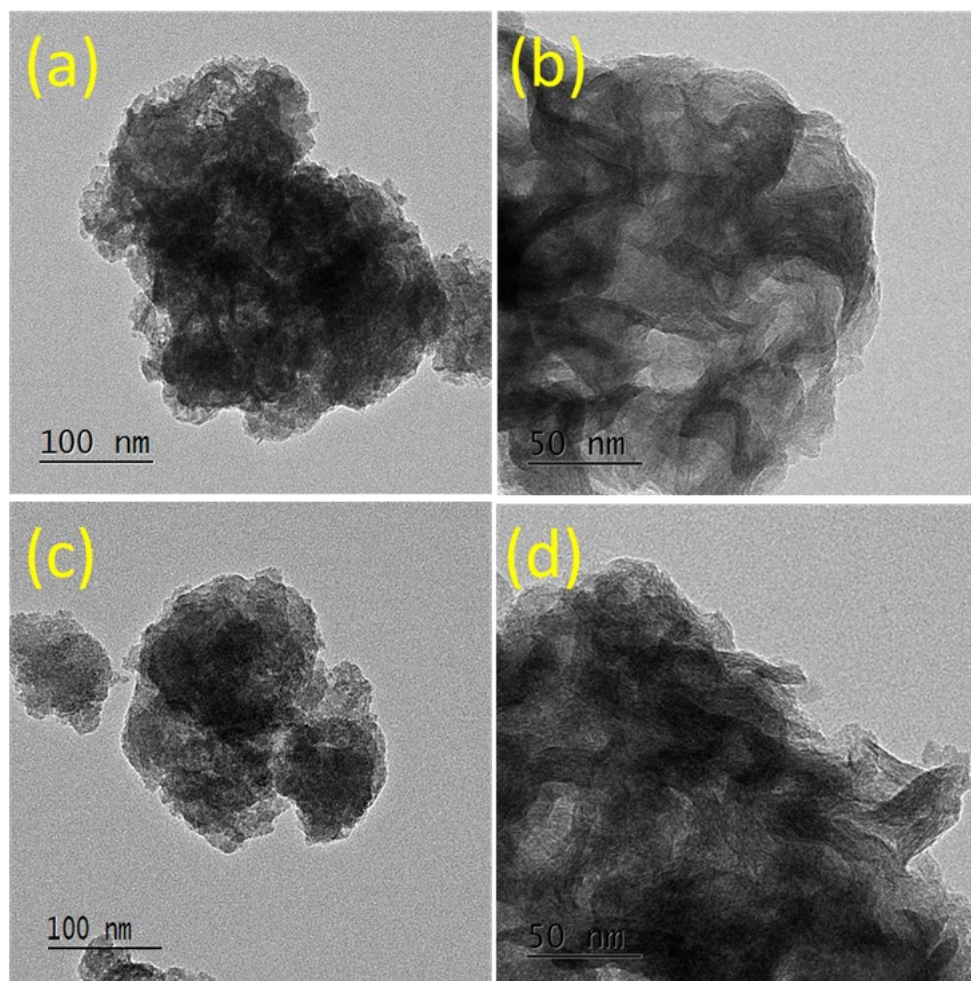

Figure S2 TEM images of (a, b) NbMo<sub>6</sub>S<sub>8</sub> and (c, d) NbMo<sub>6</sub>S<sub>8</sub>/NC materials at low and high magnifications.

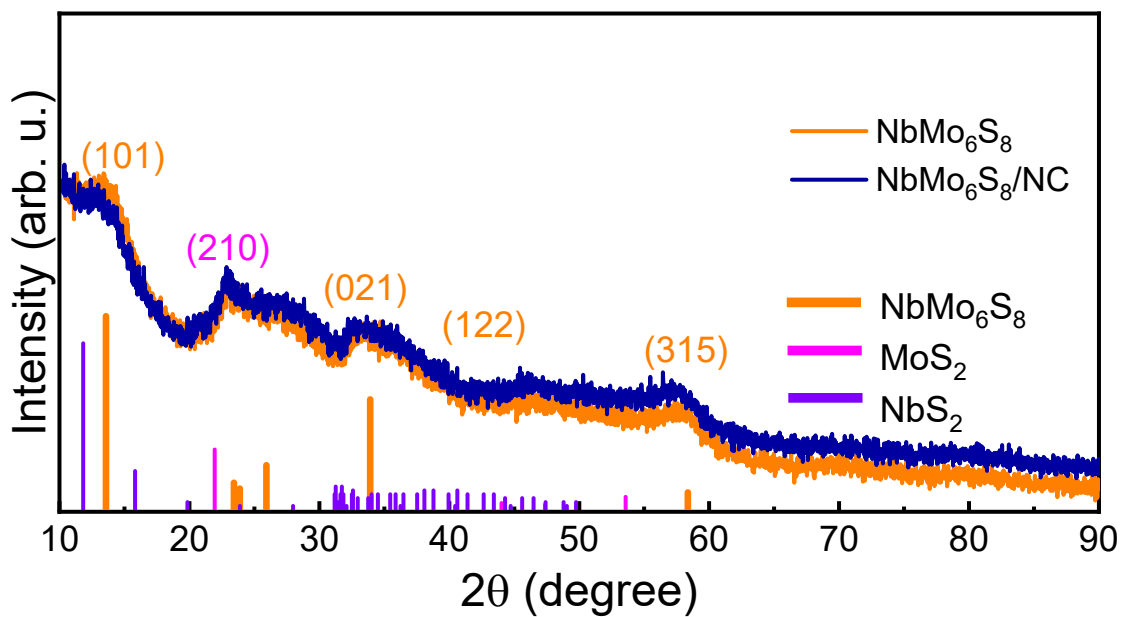

Figure S3 The XRD patterns of  $\text{NbMo}_6\text{S}_8$  and  $\text{NbMo}_6\text{S}_8/\text{NC}$  materials.

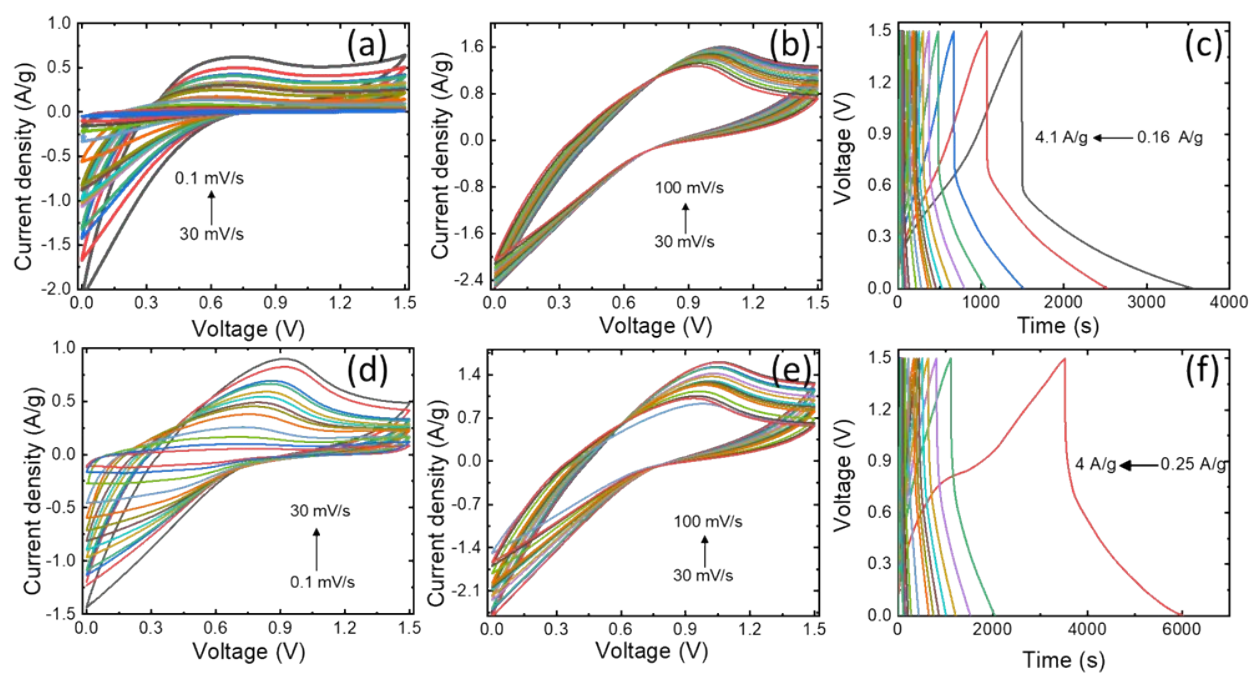

**Figure S4** Electrochemical behavior of the NbMo<sub>6</sub>S<sub>8</sub> and NbMo<sub>6</sub>S<sub>8</sub>/NC ZICs in aqueous electrolyte. Cyclic voltammograms of the NbMo<sub>6</sub>S<sub>8</sub> (a) at low and (b) high scan rates. Cyclic voltammograms of the NbMo<sub>6</sub>S<sub>8</sub>/NC (d) at low and (e) high scan rates. The galvanostatic charge-discharge profiles of (c) NbMo<sub>6</sub>S<sub>8</sub>/NC and (f) NbMo<sub>6</sub>S<sub>8</sub>/NC ZICs at different current densities.

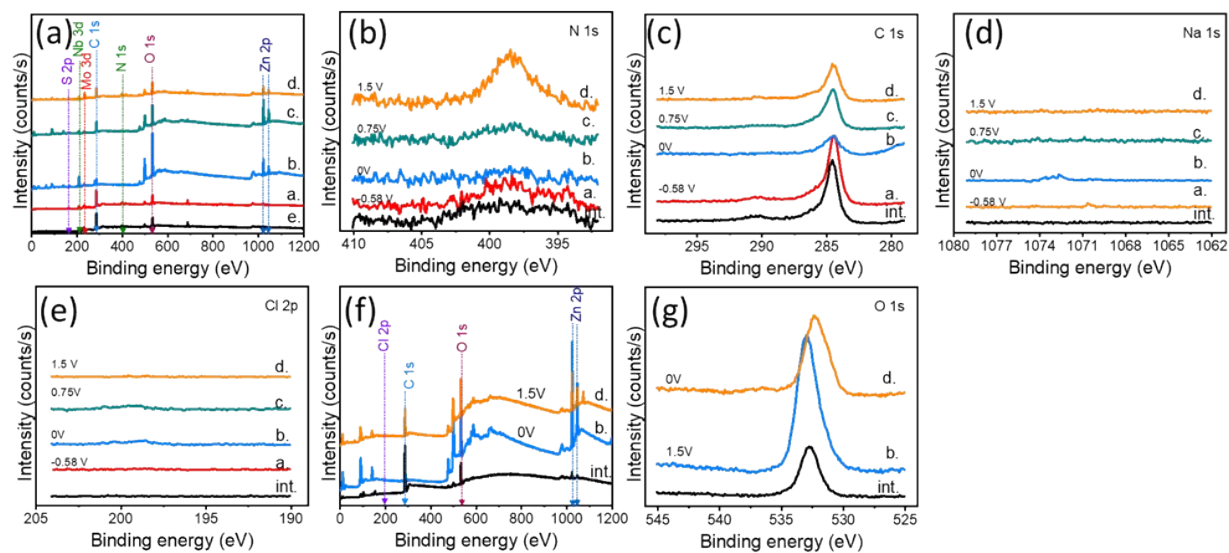

**Figure S5** XPS studies: (a) wide scan spectra of NbMo<sub>6</sub>S<sub>8</sub>/NC cathode during charge/discharge process. Core-level spectra for (b) N 1s, (c) C 1s, (d) Na 1s and (e) Cl 2p. The wide scan spectra of Zn-anode during charge, discharge, and initial state. Core-level spectra for (g) O 1s.

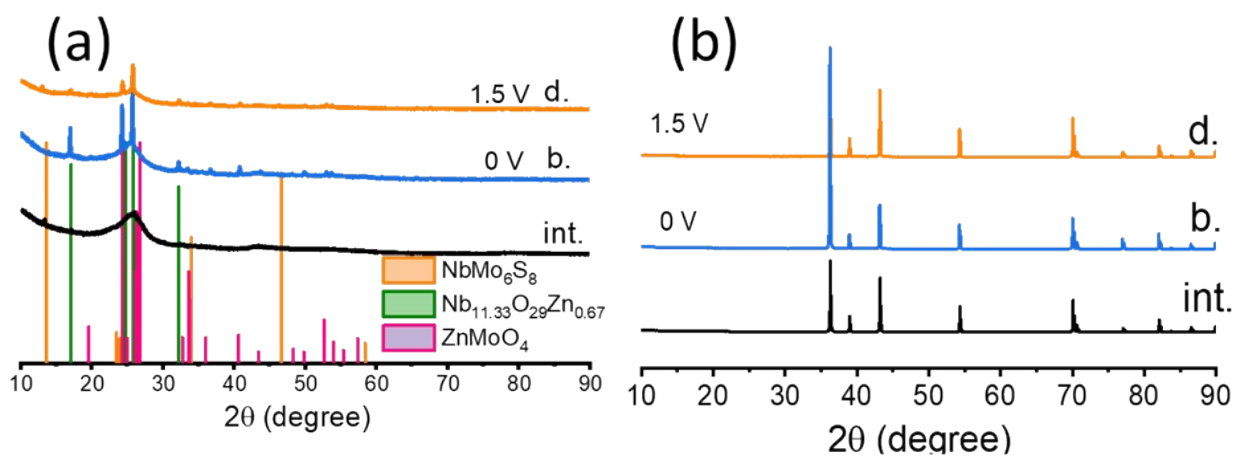

Figure S6 XRD patterns of the (a) NbMo<sub>6</sub>S<sub>8</sub>/NC cathode and (b) Zn anode at original, full charge and discharge state.



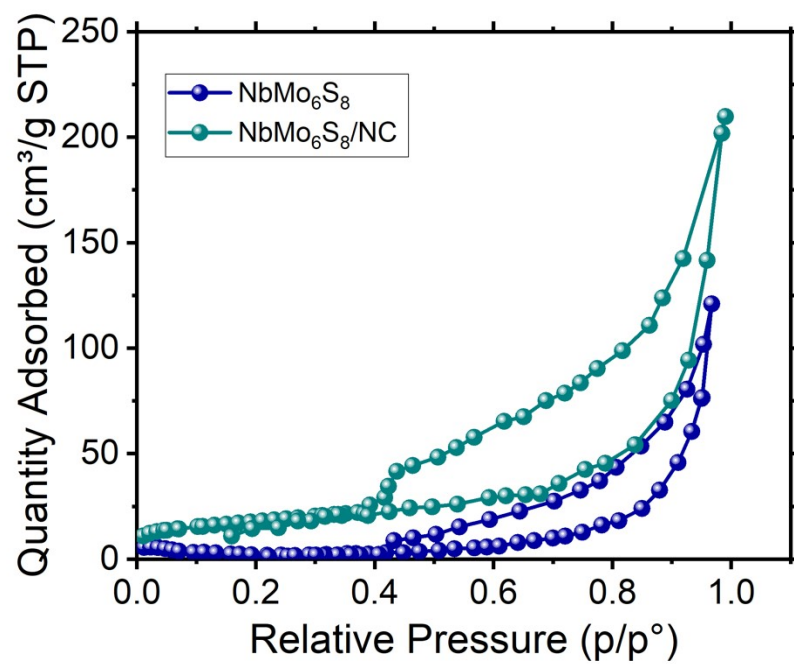

Figure S7 N<sub>2</sub> adsorption-desorption isotherms of NbMo<sub>6</sub>S<sub>8</sub>/NC, and NbMo<sub>6</sub>S<sub>8</sub>.

**Table S1** The parameter values of the NbMo<sub>6</sub>S<sub>8</sub> and NbMo<sub>6</sub>S<sub>8</sub>/NC cathode in diluted and MHCZE.

| Electrode                                  | R <sub>s</sub> (Ω/cm) | R <sub>ct</sub> (Ω/cm) |
|--------------------------------------------|-----------------------|------------------------|
| NbMo <sub>6</sub> S <sub>8</sub>           | 22.87                 | 32.87                  |
| NbMo <sub>6</sub> S <sub>8</sub> /NC       | 20.18                 | 27.75                  |
| NbMo <sub>6</sub> S <sub>8</sub> /NC MHCZE | 4.80                  | 7.12                   |

**Table S2** The performance evaluation of NbMo<sub>6</sub>S<sub>8</sub>/NC ZICs device with past reported metal-ion capacitors.

| <b>Material</b>                        | <b>Electrolyte</b>                                   | <b>Capacity</b> | <b>Energy density</b> | <b>Power density</b> | <b>Stability</b>   | <b>Ref.</b> |
|----------------------------------------|------------------------------------------------------|-----------------|-----------------------|----------------------|--------------------|-------------|
| NbMo <sub>6</sub> S <sub>8</sub> /NC   | 0.1M ZnClO <sub>4</sub> /<br>15M NaClO <sub>4</sub>  | 167.89          | 188.87                | 250                  | 87.60 %<br>(15000) | PW          |
| MoS <sub>2</sub> -160                  | 3M Zn(CF <sub>3</sub> SO <sub>3</sub> ) <sub>2</sub> | 168             |                       |                      |                    | 1           |
| TiO <sub>2</sub> /MoS <sub>2</sub> @NC | 1M NaClO <sub>4</sub>                                |                 | 148                   | 200                  |                    |             |
| 3D-IEMoS <sub>2</sub> @G               | 1M NaClO <sub>4</sub>                                | 580             | 140                   | 630                  | (10000)            | 2           |
| E-MoS <sub>2</sub>                     | 2M ZnSO <sub>4</sub>                                 | 202.6           | 148.2                 | 70.5                 | 98.6%<br>(600)     | 3           |
| MoS <sub>2-x</sub>                     | 3M Zn(CF <sub>3</sub> SO <sub>3</sub> ) <sub>2</sub> | 138.6           |                       |                      | 87.8%<br>(1000)    | 4           |
| MoPO/MoS <sub>2</sub>                  | 3M KCl                                               | ---             | 52.6                  | 746.9                | 90%<br>(26000)     | 5           |
| MoS <sub>2</sub> /Graphene             | Zn(CF <sub>3</sub> SO <sub>3</sub> ) <sub>2</sub>    | 141.6           | 157.5                 |                      | 88.2%<br>(1800)    | 6           |
| MoS <sub>2</sub> @C                    | 1M LiPF <sub>6</sub>                                 | 433.6           | 78.98                 | 11250                | 72.12%<br>3000     | 7           |
| N-doped 1T MoS <sub>2</sub>            | 3M Zn(CF <sub>3</sub> SO <sub>3</sub> ) <sub>2</sub> | 149.6           |                       |                      | 89.1%<br>(1000)    | 8           |
| D-MoS <sub>2</sub> -O                  | 3M Zn(CF <sub>3</sub> SO <sub>3</sub> ) <sub>2</sub> | 203.8           | 161.3                 |                      | 90.5 %<br>(1000)   | 9           |

|                                                       |                                    |           |       |      |         |    |
|-------------------------------------------------------|------------------------------------|-----------|-------|------|---------|----|
| MoS <sub>2</sub>                                      | 1M LiPF <sub>6</sub>               | 241.5 F/g | 69.56 | 150  | 78.0%   | 10 |
|                                                       |                                    |           |       |      | (5000)  |    |
| MoS <sub>2</sub> -SnS@g-C <sub>3</sub> N <sub>4</sub> | 1M NaClO <sub>4</sub>              |           | 193.1 | 90   | 76.3%   | 11 |
|                                                       |                                    |           |       |      | (5000)  |    |
| MoS <sub>2</sub> /N-NPCM                              | 1M LiPF <sub>6</sub>               |           | 120   | 100  | 85.5%   | 12 |
|                                                       |                                    |           |       |      | (4000)  |    |
| Gr-Nb <sub>2</sub> O <sub>5</sub>                     | 1M NaClO <sub>4</sub>              |           | 112.9 | 80.1 | 97.1%   | 13 |
|                                                       |                                    |           |       |      | (1500)  |    |
| E-MoS <sub>2</sub> /NG                                | 1M NaClO <sub>4</sub>              | 201       | 150   | 35   | 78.1    | 14 |
|                                                       |                                    |           |       |      | (1500)  |    |
| P-MoS <sub>2</sub> /PANI/rGO                          | 1M Li <sub>2</sub> SO <sub>4</sub> |           | 56    | 450  | 93.5%   | 15 |
|                                                       |                                    |           |       |      | (30000) |    |

---

## References

- 1 J. Liu, P. Xu, J. Liang, H. Liu, W. Peng, Y. Li, F. Zhang and X. Fan, *Chem. Eng. J.*, 2020, **389**, 124405.
- 2 C. Zhan, W. Liu, M. Hu, Q. Liang, X. Yu, Y. Shen, R. Lv, F. Kang and Z. H. Huang, *NPG Asia Mater.*, 2018, **10**, 775–787.
- 3 H. Li, Q. Yang, F. Mo, G. Liang, Z. Liu, Z. Tang, L. Ma, J. Liu, Z. Shi and C. Zhi, *Energy Storage Mater.*, 2019, **19**, 94–101.
- 4 W. Xu, C. Sun, K. Zhao, X. Cheng, S. Rawal, Y. Xu and Y. Wang, *Energy Storage Mater.*, 2019, **16**, 527–534.
- 5 Z. Qin, X. Pan, G. Qiu, Z. Zhang, Y. Chen, S. Nasir Khisro, Y. Zhang, L. Zhao and X. Chen, *Chem. Eng. J.*, 2022, **428**, 131179.
- 6 Q. X. Li S, Liu Y, Zhao X, Shen Q, Zhao W, Tan Q, Zhang N, Li P, Jiao L, *Adv. Mater.*, 2021, **33**, 2007480.
- 7 H. J. Zhang, Q. C. Jia and L. Bin Kong, *Appl. Surf. Sci.*, 2020, **531**, 147222.
- 8 Z. Sheng, P. Qi, Y. Lu, G. Liu, M. Chen, X. Gan, Y. Qin, K. Hao and Y. Tang, *ACS Appl. Mater. Interfaces*, 2021, **13**, 34495–34506.
- 9 S. Li, Y. Liu, X. Zhao, K. Cui, Q. Shen, P. Li, X. Qu and L. Jiao, *Angew. Chemie*, 2021, **133**, 20448–20455.
- 10 J. Ju, L. Zhang, H. Shi, Z. Li, W. Kang and B. Cheng, *Appl. Surf. Sci.*, 2019, **484**, 392–402.
- 11 X. Yuan, S. Qiu and X. Zhao, *ACS Appl. Mater. Interfaces*, 2021, **13**, 34238–34247.
- 12 J. Jiang, Y. Zhang, Y. An, L. Wu, Q. Zhu, H. Dou and X. Zhang, *Small Methods*, 2019, **3**, 1900081.
- 13 X. Wang, Q. Li, L. Zhang, Z. Hu, L. Yu, T. Jiang, C. Lu, C. Yan, J. Sun and Z. Liu, *Adv. Mater.*, 2018, **30**, 1800963.

- 14 S. Liang, S. Zhang, Z. Liu, J. Feng, Z. Jiang, M. Shi, L. Chen, T. Wei and Z. Fan, *Adv. Energy Mater.*, 2021, **11**, 1–11.
- 15 J. Chao, L. Yang, H. Zhang, J. Liu, R. Hu and M. Zhu, *J. Power Sources*, , DOI:10.1016/j.jpowsour.2019.227680.
